# Supplementary material
Source: publisher figshare collection journal article supplement (https://tandf.figshare.com/ndownloader/files/13729652)
Supplement: Supplementary file 1 [file 13729652]

Table S1. a) Physical, Chemical and Biological Properties of the Bay of Quinte, August 17­–19 2010.

| **Station** | **Date** | **Temp**  **oC** | **Chl *a***  **μg l-1** | **TP**  **μg l-1** | **SRP**  **μg l-1** | **NO3+NO2**  **μg l-1** | **SiO2**  **mg l-1** |
| --- | --- | --- | --- | --- | --- | --- | --- |
| **Upper Bay** | | | | | | | |
| T3 | 17-Aug | 24.4 | 12.1 | 50.4 | 11.1 | Det. | 6.4 |
| B | 17-Aug | 24.4 | 29.9 | 52.4 | 3.7 | 9.0 | 7.2 |
| BB | 17-Aug | 23.9 | 18.2 | 46.1 | 2.2 | Det. | 6.1 |
| **Middle Bay** | | | | | | | |
| N | 18-Aug | 23.7 | 21.4 | 46.0 | 5.4 | Det. | 3.5 |
| HB | 18-Aug | 23.4 | 25.1 | 53.0 | 4.9 | 9.0 | 3.3 |
| HB4 | 18-Aug | 23.6 | 32.8 | 46.4 | 2.4 | Det. | 3.1 |

Table S1. b) Physical, Chemical and Biological Properties of the Bay of Quinte, September 21-23 2010.

| **Station** | **Date** | **Temp**  **oC** | **Chl *a***  **μg l-1** | **TP**  **μg l-1** | **SRP**  **μg l-1** | **NO3+NO2**  **μg l-1** | **SiO2**  **mg l-1** |
| --- | --- | --- | --- | --- | --- | --- | --- |
| **Upper Bay** | | | | | | | |
| B | 22-Sep | 18.0 | 13.2 | 31.7 | 1.1 | Det. | 5.9 |
| BB | 22-Sep | 17.5 | 12.8 | 32.4 | 1.4 | Det. | 4.7 |
| BQ12 | 22-Sep | 17.5 | 13.9 | 36.0 | 1.2 | 6.0 | 4.7 |
| **Middle Bay** | | | | | | | |
| N2 | 23-Sep | 18.0 | 12.5 | 38.1 | 2.9 | Det. | 3.6 |
| HB | 21-Sep | 17.5 | 12.8 | 38.2 | 2.0 | Det. | 2.4 |
| HBA3 | 21-Sep | 17.5 | 17.3 | 38.3 | 1.0 | 7.0 | 0.7 |
| HB5 | 21-Sep | 16.5 | 27.3 | 61.8 | 1.3 | 8.0 | 0.8 |
| **Lower Bay** | | | | | | | |
| P | 21-Sep | 17.5 | 9.3 | 30.9 | 0.9 | 53.0 | 0.6 |
| GL | 21-Sep | 19.6 | 7.6 | 16.8 | 0.9 | 106.0 | 0.8 |

Table S1. c) Physical, Chemical and Biological Properties of the Bay of Quinte, September 13-16 2011.

| **Station** | **Date** | **Temp**  **oC** | **Chl *a***  **μg l-1** | **TP**  **μg l-1** | **SRP**  **μg l-1** | **NO3+NO2**  **μg l-1** | **SiO2**  **mg l-1** |
| --- | --- | --- | --- | --- | --- | --- | --- |
| **Upper Bay** | | | | | | | |
| BQ7 | 14-Sep | 21.0 | 18.6 | 36.9 | -- | -- | 4.1 |
| B | 14-Sep | 21.1 | 17.2 | 31.5 | -- | -- | 3.6 |
| BQ6 | 14-Sep | 21.2 | 21.8 | 42.9 | -- | -- | 3.6 |
| BB | 14-Sep | 20.8 | 23.8 | 44.0 | -- | -- | 2.6 |
| **Middle Bay** | | | | | | | |
| N | 13-Sep | 21.9 | 21.2 | 41.3 | -- | -- | 2.6 |
| BQ8 | 13-Sep | 21.9 | 12.3 | 29.3 | -- | -- | 1.4 |
| BQ9 | 13-Sep | 21.7 | 21.9 | 38.1 | -- | -- | 2.7 |
| HB | 15-Sep | 20.7 | 26.0 | 51.3 | -- | -- | 3.4 |
| HB4 | 15-Sep | 20.8 | 22.2 | 49.4 | -- | -- | 3.7 |
| HB5 | 15-Sep | 20.7 | 23.4 | 39.0 | -- | -- | 3.1 |

Table S2. a) Phytoplankton species that contribute >5% to total biomass at algal bloom sites in the upper Bay of Quinte. Potentially toxigenic species are bolded.

| **Station** | **Aug. 2010** | **Sept. 2010** | **Sept. 2011** |
| --- | --- | --- | --- |
| T3 | *Aphanocapsa holsatica (31.9%)*  *Aulacoseira ambigua (24.8%)*  *A. granulata (5.9%)*  ***Cyanodictyon reticulatum*** *(5.2%)* | n/a | n/a |
| BQ 7 | n/a | n/a | *Aulacoseira granulata (59.7%)*  *A. ambigua (20.7%)*  ***Dolichospermum lemmermannii*** *(5.8%)* |
| B | *Aulacoseira ambigua (33.5%)*  *A. granulata (17.0%)*  ***Cyanodictyon reticulatum*** *(5.3%)* | ***Dolichospermum crassa*** *(28.0%)*  ***Microcystis novacekii*** *(15.7%)*  ***M. botrys*** *(10.3%)*  ***D. lemmermannii*** *(7.7%)*  ***D. spiroides*** *(6.6%)*  ***Cyanodictyon reticulatum*** *(5.3%)* | ***Dolichospermum planctonica*** *(30.9%)*  ***D. crassa*** *(25.7%)*  *Aulacoseira ambigua (16.9%)*  *A. granulata (7.4%)* |
| BQ 6 | n/a | n/a | *Aulacoseira ambigua (51.6%)*  ***Dolichospermum lemmermannii*** *(20.8%)* |
| BQ 12 | n/a | *Aulacoseira ambigua (38.1%)*  ***Cyanodictyon reticulatum*** *(10.3%)* | n/a |
| BB | *Aulacoseira ambigua (65.3%)*  *A. granulata (12.1%)* | ***Cyanodictyon reticulatum*** *(12.7%)*  *Dolichospermum sp. (12.6%)*  *Stephanodiscus agassizensis (10.3%)*  *Aulacoseira ambigua (9.2%)*  *Pseudanabaena sp. (5.4%)*  *Microcystis sp. (5.2%)* | *Aulacoseira ambigua (43.6%)*  ***Microcystis botrys*** *(18.1%)*  *A. granulata (9.6%)* |

Table S2. b) Phytoplankton species that contribute >5% to total biomass at algal bloom sites in the middle and lower Bay of Quinte. Potentially toxigenic species are bolded.

| **Station** | **Aug. 2010** | **Sept. 2010** | **Sept. 2011** |
| --- | --- | --- | --- |
| N | *Aulacoseira granulata (43.3%)*  *A. ambigua (29.8%)*  *Lyngbya sp. (5.1%)* | n/a | ***Microcystis botrys*** *(32.0%)*  *Microcystis sp. (19.9%)*  *Aulacoseira granulata (15.8%)*  *A. ambigua (13.1%)* |
| BQ 8 | n/a | n/a | *Aulacoseira ambigua (31.5%)*  *A. granulata (27.0%)*  *Aphanocapsa holsatica (10.2%)* |
| BQ 9 | n/a | n/a | *Aulacoseira granulata (65.1%)*  *A. ambigua (9.6%)* |
| N2 | n/a | *Aulacoseira granulata (38.1%)*  *A. ambigua (16.0%)*  *Stephanodiscus agassizensis (12.3%)*  ***Microcystis botrys*** *(5.5%)* | n/a |
| HB | ***Gloeotrichia echinulata*** *(60.3%)*  ***Microcystis botrys*** *(9.7%)*  ***Lyngbya birgei*** *(7.7%)* | *Aulacoseira ambigua (27.3%)*  *Stephanodiscus agassizensis (17.9%)*  *A. granulata (13.9%)*  ***Microcystis botrys*** *(12.6%)*  ***M. novacekii*** *(8.3%)* | *Aulacoseira granulata (42.1%)*  *Microcystis wesenbergii (29.1%)*  *M. viridis (9.6%)* |
| HB 4 | ***Microcystis botrys*** *(42.4%)*  ***Lyngbya birgei*** *(9.9%)*  *M. wesenbergii (9.2%)*  *Aulacoseira ambigua (7.9%)*  ***Dolichospermum crassa*** *(7.1%)*  ***M. novaceki*** *(5.4%)* | n/a | *Microcystis wesenbergii (19.0%)*  ***M. viridis*** *(14.3%)*  ***M. botrys*** *(14.2%)*  *Pediastrum duplex (14.0%)*  *Aulacoseira ambigua (9.1%)*  *A. granulata (6.4%)*  *M. flos-aquae (5.4%)* |
| HBA 3 | n/a | *Aulacoseira ambigua (33.9%)*  *A. granulata (23.4%)*  *Microcystis wesenbergii (11.6%)* | n/a |
| HB 5 | n/a | *Aulacoseira granulata (19.9%)*  *A. ambigua (16.2%)*  ***Dolichospermum crassa*** *(13.3%)*  ***Aphanizomenon gracile*** *(8.3%)*  *Pseudanabaena sp. (5.7%)* | n/a |
| P | n/a | *Aulacoseira ambigua (77.9%)* | n/a |
| GL | n/a | *Aulacoseira ambigua (51.0%)*  *A. granulata (27.6%)*  *Microcystis wesenbergi (6.6%)* | n/a |

Table S3. a) Characteristics of algal blooms observed during August 2010. Shown are sites where a single taxon (i.e. Cyanophyta or Diatomeae) accounts for > 60% of the total biomass and > 80% of a particular size class.

| **Station** | **Dominant Assemblage** | **Size Class** | **% Size Class Biomass** | **P/B (x103)** |
| --- | --- | --- | --- | --- |
| B2 | Diatomeae:  *Aulacoseira ambigua; A. granulata* | > 20 µm | 93.3 | 6.5 |
| N | Diatomeae:  *A. granulata; A. ambigua* | > 20 µm | 85.7 | 19.0 |
| HB | *Gleotrichia echinulata*  *Lyngbya birgei*  *Aphanizomenon gracile* | > 20 µm | 89.4 | 13.5 |
| HB 4 | *Microcystis botrys; M. wesenbergi*  *M. novacekii; M. aeruginosa*  *Dolichospermum crassa*  *D. planctonica* | 2 – 20 µm | 100.0 | 4.7 |

Table S3. b) Characteristics of algal blooms observed during September 2010. Shown are sites where a single taxon (i.e. Cyanophyta or Diatomeae) accounts for > 60% of the total biomass and > 80% of a particular size class.

| **Station** | **Dominant Assemblage** | **Size Class** | **% Size Class Biomass** | **P/B (x103)** |
| --- | --- | --- | --- | --- |
| B | Cyanophyta :  *Dolichospermum crassa;*  *D. lemmermannii; D. spiroides*  *Microcystis novacekii; M. botrys*  *Chroococcus minimus* | 2 – 20 µm | 91.1 | 9.3 |
| HB | Diatomeae:  *Aulacoseira granulata; A. ambigua*  *Stephanodiscus agassinensis* | > 20 µm | 98.5 | 16.2 |
| PI | *Diatomeae:*  *A. ambigua* | 2 – 20 µm | 88.9 | 11.9 |
| GL | *Diatomeae:*  *A. ambigua* | > 20 µm | 96.4 | 11.4 |

Table S3. c) Characteristics of algal blooms observed during September 2011. Shown are sites where a single taxon (i.e. Cyanophyta or Diatomeae) accounts for > 60% of the total biomass and > 80% of a particular size class.

| **Station** | **Dominant Assemblage** | **Size Class** | **% Size Class Biomass** | **P/B (x103)** |
| --- | --- | --- | --- | --- |
| BQ 7 | Diatomeae:  *A Aulacoseira granulata; A. ambigua* | > 20 µm | 97.8 | 13.9 |
| B | Cyanophyta:  *Dolichospermum crassa*  *Microcystis aeruginosa* | 2 – 20 µm | 85.6 | 10.5 |
| BQ9 | *Diatomeae:*  *A. granulata; A. ambigua* | > 20 µm | 94.4 | 9.9 |
| N | *Cyanophyta:*  *M. botrys; M. Wesenbergi*  *D. planctonicum; D. crassa* | 2 – 20 µm | 92.9 | 4.7 |

Table S4. a) Cyanophyta species observed during the August 2010 survey of the Bay of Quinte. Potentially toxigenic species are bolded. (*) indicates species contributes < 1% of total biomass, (++) contributes 1% - 5% of total biomass and (+++) contributes >5% of total biomass.

| Cyanophyta - August, 2010 Survey | **T3** | **B** | **BB** | **N** | **HB** | **HB4** |
| --- | --- | --- | --- | --- | --- | --- |
| ***Dolichospermum* sp.** | * | + | * |  | * |  |
| *D. compacta* Kuetz (Trivisan) |  | * |  |  |  |  |
| ***D. flos-aquae* (Lyngb.) De Brebisson** |  |  |  | * |  |  |
| *D. macrospora* Klebahn |  |  | * |  |  |  |
| ***D. planctonica* Brunnthaler** |  | + | + |  | * | + |
| *D. aphanizomenoides*Forti |  |  | * |  | * |  |
| ***D. crassa* (Lemmermann) Komárková-Legnová & Cronberg** | * |  |  | * | + | ++ |
| ***D. lemmermannii* P.G.Richter** |  | * |  |  |  |  |
| *A. mendotae* W.Trelease |  |  |  | * |  |  |
| *Anabaenopsis elenkenii*  Miller |  |  | * |  |  |  |
| ***Aphanizomenon* sp.** | * |  | * | * | * | * |
| ***A. flos-aquae* (L.) Ralfs** |  |  |  |  | * |  |
| ***A. gracile* (Lemmermann) Lemmermann** |  | * |  |  | + | * |
| *A. aphanizomenoides* (Forti) Hortobágyi & Komárek |  | * |  |  |  |  |
| *Aphanocapsa* sp. |  |  |  | * |  | * |
| *A. delicatissima* West & West | * |  |  |  |  |  |
| *A. elachista* West & West | * |  | * |  |  |  |
| *A. minutissima* |  |  |  |  |  | * |
| *A. holsatica* (Lemmermann) G. Cronberg & Komárek | ++ |  | * | + |  |  |
| ***A. incerta* (Lemmermann) G. Cronberg & Komárek** |  | + |  |  | * |  |
| *Aphanotheca* sp. |  |  |  | * | * |  |
| *Chroococcus* sp. | * |  |  |  | * |  |
| *C. aphanocapsoides* Skuja | + | * | * |  | * |  |
| *C. dispersus* (Keissl.) Lemmermann | * | * |  | + |  |  |
| *C. limneticus* Lemmermann |  |  |  |  |  | * |
| *C. minimus* (Keissler) Lemmermann |  |  |  | * |  |  |
| *C. minutus* (Kütz.) Naegeli | * | * |  | * |  | * |
| ***Coelomoron* sp.** |  |  |  | * |  |  |
| *Coelosphaerium Kuetzingianum* Naegeli | * |  |  |  |  | * |
| *Cuspidothrix issatschenkoi* (Usachev) P. Rajaniemi, Komárek, R. Willame, P. Hrouzek, K. Kastovská, L. Hoffmann & K. Sivonen | * | * | * | * | * |  |
| ***Cyanodictyon planctonicum* B.A. Mayer** | * | * | * | * |  | * |
| ***C. reticulatum* (Lemmermann) Geitler** | ++ | ++ | * | * | * | * |
| *Cylindrospermopsis* sp. |  | * | * |  |  |  |
| *Cylindrotheca closterium* (Ehrenberg) Reimann & J.C. Lewin |  |  |  |  | * |  |
| *Eucapsis* sp. |  |  |  |  |  | * |
| ***Gloeotrichia echinulata* P.G. Richter** |  |  |  |  | ++ |  |
| *Limnoraphis birgei* (G.M.Smith) J. Komárek, E. Zapomelová, J. Smarda, J. Kopecky, E. Rejmánková, J. Woodhouse, B.A. Neilan & J. Komárková |  |  |  |  | ++ | ++ |
| ***Lyngbya* sp.** |  |  |  | ++ |  |  |
| *L. limnetica* Lemmermann |  | * | * |  | * |  |
| *Merismopedia glauca* (Ehrenberg) Kützing |  |  | * | * |  |  |
| *M. punctata* Meyen | * |  |  |  |  |  |
| *M. tenuissima* Lemmermann |  |  | * |  |  |  |
| *M. warmingiana* (Lagerheim) Forti | * |  |  |  |  | * |
| ***Microcystis* sp.** | * |  | * |  | + |  |
| ***M. aeruginosa* Kütz.** |  | * | + | * | + | + |
| ***M. botrys* Teiling** | + | * | * | + | ++ | ++ |
| ***M. viridis* (A. Brebison in Rabenhorst) Lemmerman** | + |  |  | + |  | * |
| *M. wesenbergii* (Komarek) Starmach | * | * | * | * | * | ++ |
| ***M. novacekii* (Komárek) Compère** | + | * | * | * |  | ++ |
| *Myxobactron* sp. |  |  |  |  | * |  |
| ***Pseudanabaena* sp.** | * | * |  |  | * | * |
| *P. mucicola* (Naumann & Huber-Pestalozzi) Schwabe | * | * | * |  |  |  |
| *P. woronichinii* Anagnostidis |  |  |  | * |  |  |
| ***P. limnetica* (Lemmermann) Komárek** |  | * | * | * |  | * |
| *Radiocystis geminata* Skuja | + | * | * | * |  | * |
| *Snowella lacustris* (Chodat) Komárek & Hindák |  |  |  | * |  |  |
| ***Synechococcus* sp.** |  |  |  |  | * |  |

Table S4. b) Cyanophyta species observed during the August 2010 survey of the Bay of Quinte. Potentially toxigenic species are bolded. (*) indicates species contributes < 1% of total biomass, (++) contributes 1% - 5% of total biomass and (+++) contributes >5% of total biomass.

| Cyanophyta - September, 2010 Survey | **B** | **BB** | **BQ12** | **N2** | **HB** | **HBA3** | **HB5** | **P** | **GL** |
| --- | --- | --- | --- | --- | --- | --- | --- | --- | --- |
| ***Dolichospermum* sp.** | * | ++ | * | * |  |  | * |  |  |
| ***D. planctonica* Brunnthaler** | * | + | + | * | + |  | * |  |  |
| ***D. spiroides* Klebahn** | ++ |  |  |  |  |  |  |  |  |
| ***D. crassa* (Lemmermann) Komárková-Legnová & Cronberg** | ++ | + | * |  |  | * | ++ |  |  |
| *D. ellipsoidea* (Compère) Komárek |  |  | * |  |  |  |  |  |  |
| ***D. lemmermannii* P.G. Richter** | ++ |  |  |  | * |  | * |  |  |
| *D. mendotae* W. Trelease |  |  |  | * |  |  |  |  |  |
| ***Aphanizomenon* sp.** |  | + | * | * |  | + | + | * | * |
| ***A. gracile* (Lemmermann) Lemmermann** |  |  | * | * | * |  | ++ |  |  |
| *A. aphanizomenoides* (Forti) Hortobágyi & Komárek |  | * | * |  |  |  |  |  |  |
| *A. skujae* Komárková-Legnerová & Cronberg |  |  |  |  |  |  | * |  |  |
| *Aphanocapsa* sp. |  | * | * | * | * | + |  |  |  |
| *A. delicatissima* West & West |  |  | * |  |  |  |  |  |  |
| *A. elachista* West & West |  |  | * |  |  |  |  |  |  |
| *A. holsatica* (Lemmermann) G. Cronberg & Komárek |  |  |  |  |  | * | * | * |  |
| ***A. incerta* (Lemmermann) G. Cronberg & Komárek** |  |  | * | * |  |  |  |  |  |
| *Aphanotheca* sp. |  |  |  |  | * | * |  |  |  |
| *A. bachmanii* |  |  |  |  |  |  | + |  |  |
| *A. clathrata* v. *brevis* Bachmann |  |  |  |  |  | * |  |  |  |
| *Chroococcus aphanocapsoides* Skuja |  |  |  | * |  |  |  |  |  |
| *C. minimus* (Keissler) Lemmermann | + |  |  |  |  |  |  |  |  |
| *C. minutus* (Kütz.) Naegeli |  | * | * | + |  | * |  | * | * |
| *Coelosphaerium Kuetzingianum* Naegeli |  |  |  |  |  | + |  |  |  |
| *C. pallidum* Lemmermann |  |  |  |  |  |  | * |  |  |
| *Cuspidothrix issatschenkoi* (Usachev) P. Rajaniemi, Komárek, R. Willame, P. Hrouzek, K. Kastovská, L. Hoffmann & K. Sivonen |  | + | * |  | * |  | * |  |  |
| ***Cyanodictyon planctonicum* B.A. Mayer** | * |  |  |  | * |  |  |  |  |
| ***C. reticulatum* (Lemmermann) Geitler** | ++ | ++ | ++ | * | + | * | + | * | * |
| *Cylindrospermopsis* sp. |  | + | * |  |  | + | + | * | * |
| ***C. raciborskii* (Wolosz.) Seena. & Subbar.** |  |  |  | * |  |  |  |  |  |
| *Eucapsis* sp. |  |  |  |  |  |  |  | * |  |
| *Limnoraphis birgei* (G.M. Smith) J. Komárek, E. Zapomelová, J. Smarda, J. Kopecky, E. Rejmánková, J. Woodhouse, B.A. Neilan & J. Komárková |  | + |  |  |  |  |  |  |  |
| *Limnothrix* sp. | * |  | * |  |  | * |  | * |  |
| *Lyngbya limnetica* Lemmermann | * | * | + |  | * | * |  |  |  |
| *Merismopedia glauca* (Ehrenberg) Kützing |  |  | * | * | * |  | * |  |  |
| *M. punctata* Meyen |  |  | * |  |  |  |  |  |  |
| *M. tenuissima* Lemmermann | * |  |  |  |  |  |  |  |  |
| *M. warmingiana* (Lagerheim) Forti |  |  | * | * |  |  |  |  |  |
| ***Microcystis* sp.** |  | ++ |  | * |  | * | + |  | + |
| ***M. aeruginosa* Kütz.** |  |  |  |  | * | + |  | * |  |
| ***M. botrys* Teiling** | ++ |  | * | ++ | ++ |  | + |  | * |
| ***M. viridis* (A. Brebison in Rabenhorst) Lemmerman** |  | * | + |  | + | * | * |  |  |
| *M. wesenbergii* (Komarek) Starmach |  |  | * | * | + | ++ | + | * | ++ |
| ***M. novacekii* (Komárek) Compère** | ++ | * |  | * | ++ |  |  |  |  |
| *M. smithii* Komárek & Anagnostidis |  |  |  |  |  |  | * |  |  |
| *Planktolyngbya* sp. |  |  |  | * |  |  |  |  |  |
| ***Planktothrix suspensa* (Pringsheim) Anagnostidis & Komárek** |  |  |  |  |  |  |  |  | * |
| ***Pseudanabaena* sp.** |  | ++ |  | * | * | + | ++ | * | * |
| *P. mucicola* (Naumann & Huber-Pestalozzi) Schwabe |  |  |  | * |  | * |  |  | * |
| *P. woronichinii* Anagnostidis |  |  |  |  |  |  |  | * |  |
| ***P. limnetica* (Lemmermann) Komárek** | * |  | + |  | * | * |  |  |  |
| ***Radiocystis geminata* Skuja** |  |  | * | * |  |  |  |  |  |
| ***Synechococcus* sp.** |  |  |  |  |  |  |  |  | * |

Table S4. c) Cyanophyta species observed during the August 2010 survey of the Bay of Quinte. Potentially toxigenic species are bolded. (*) indicates species contributes < 1% of total biomass, (++) contributes 1% - 5% of total biomass and (+++) contributes >5% of total biomass.

| **Cyanophyta** | **BQ7** | **B** | **BQ6** | **BB** | **BQ8** | **N** | **BQ9** | **HB** | **HB4** | **HB5** |
| --- | --- | --- | --- | --- | --- | --- | --- | --- | --- | --- |
| ***Dolichospermum* sp.** | + | ++ | + | + | + | + | * |  | * | + |
| ***D. flos-aquae* (Lyngb.) De Brebisson** | * | * | * | * |  | * | * | * | * | + |
| ***D. planctonica* Brunnthaler** | * | ++ | + | + | * | + | * |  | * | + |
| ***D. crassa* (Lemmermann) Komárková-Legnová & Cronberg** |  |  |  |  |  |  |  | * |  |  |
| ***D. lemmermannii* P.G. Richter** | ++ |  | ++ |  |  |  |  |  |  |  |
| *A. mendotae* W. Trelease |  | * |  | + |  |  |  |  |  |  |
| *Aphanizomenon* sp. | * | * | * | * | * | * | * | * |  | + |
| ***D. gracile* (Lemmermann) Lemmermann** |  | * | + | * | * |  | * |  | * | ++ |
| *D. aphanizomenoides* (Forti) Hortobágyi & Komárek | * | * | * | * |  | * |  |  | * | * |
| *Aphanocapsa* sp. |  |  |  |  | * | * |  |  |  | ++ |
| *A. delicatissima* West & West |  | * | * |  |  |  |  |  | * |  |
| *A. holsatica* (Lemmermann) G. Cronberg & Komárek | * | * | * | * | ++ | * | + | * | * | + |
| ***A. incerta* (Lemmermann) G. Cronberg & Komárek** |  |  | * |  |  |  |  |  |  |  |
| *Chroococcus* sp. |  |  |  |  | * |  |  |  |  |  |
| *C. aphanocapsoides* Skuja | * | * | * | * | * | * | * | * | * | * |
| ***C. dispersus* (Keissl.) Lemmermann** |  |  |  |  |  |  |  | * |  |  |
| *C. limneticus* Lemmermann |  |  |  |  |  | * |  | * |  |  |
| *C. minutus* (Kütz.) Naegeli |  | * |  | * | * |  |  |  |  |  |
| *Coelosphaerium Kuetzingianum* Naegeli | * |  | * |  |  | * | + |  | * | * |
| *Cuspidothrix issatschenkoi* (Usachev) P. Rajaniemi, Komárek, R. Willame, P. Hrouzek, K. Kastovská, L. Hoffmann & K. Sivonen | * | * | * | * |  | * | * | * | * | + |
| ***Cyanodictyon planctonicum* B.A. Mayer** |  |  |  | * |  | * |  |  |  |  |
| ***C. reticulatum* (Lemmermann) Geitler** | + | + | + | * | + | * | * | * | * | * |
| *Cylindrospermopsis* sp. |  |  |  |  |  |  | * |  | * | * |
| ***Gloeocapsa* sp.** |  |  |  |  | * |  |  |  |  |  |
| *Lemmermanniella pallida* (Lemmermann) Geitler |  |  |  |  |  |  | * |  |  |  |
| *Limnoraphis birgei* (G.M. Smith) J. Komárek, E. Zapomelová, J. Smarda, J. Kopecky, E. Rejmánková, J. Woodhouse, B.A. Neilan & J. Komárková |  |  |  |  |  | * |  | * |  |  |
| *Limnothrix* sp. | * | * | * |  | * |  | * |  | * | * |
| *Lyngbya limnetica* Lemmermann |  | * | * |  |  |  |  |  |  | ++ |
| *Merismopedia glauca* (Ehrenberg) Kützing |  | * | * | * | * |  |  |  |  | * |
| *M. warmingiana* (Lagerheim) Forti |  |  |  | * | * | * | * |  | * | * |
| ***Microcystis* sp.** |  |  |  | * | + | ++ | * |  | * | + |
| ***M. aeruginosa* Kütz.** |  | + |  |  |  |  | * | + | * | * |
| ***M. botrys* Teiling** | * |  | + | ++ | + | ++ | + | + | ++ |  |
| *M. flos-aquae* (Wittrock) Kirchner |  |  |  |  |  |  |  |  | ++ |  |
| ***M. viridis* (A. Brebison in Rabenhorst) Lemmerman** |  | * |  |  | * |  | * | ++ | ++ | * |
| *M. wesenbergii* (Komarek) Starmach |  |  | * | + | * | + | + | ++ | ++ | ++ |
| ***M. novacekii* (Komárek) Compère** |  | * |  |  | * |  | * |  |  | * |
| ***Pseudanabaena* sp.** |  |  |  | * |  | * | * | * | * | * |
| *P. mucicola* (Naumann & Huber-Pestalozzi) Schwabe |  | * |  |  |  |  |  |  | * |  |
| ***Radiocystis geminata* Skuja** | * |  | * | * |  |  | * |  | * | * |
| *Rhabdoderma lineare* Schmidle & Lauterborn |  |  |  |  |  |  |  | * |  |  |
| ***Synechococcus* sp.** | * |  |  | * |  | * |  |  |  |  |
| *Woronichinia compacta* (Lemmermann) Komárek & Hindák |  |  |  |  |  |  |  |  | * | * |
